# Supplementary material for: Measurable Residual Disease Monitoring by Locked Nucleic Acid Quantitative Real-Time PCR Assay for IDH1/2 Mutation in Adult AML
Source: MDPI journal article supplement (doi:10.3390/cancers14246205), 2022-12-15

**Table S1** *IDH1/2* LNA-qPCR of 19 normal bone marrow samples from healthy donors

| <i>IDH1/2</i> mutant type | Copy  | S.D. (Copy) | NCN ( <i>IDH</i> / <i>ALB</i> ×10 <sup>6</sup> ) | S.D (NCN) |
|---------------------------|-------|-------------|--------------------------------------------------|-----------|
| R132C (c.394C>T)          | 73.12 | 28.70       | 1119.43                                          | 569.22    |
| R132G (c.394C>G)          | 0.01  | 0           | 0.20                                             | 0.29      |
| R132H (c.395G>A)          | 33.19 | 16.14       | 462.23                                           | 181.04    |
| R132L (c.395G>T)          | 0.90  | 1.10        | 11.33                                            | 14.24     |
| R132S (c.394C>A)          | 5.72  | 2.74        | 77.22                                            | 37.44     |
| R140Q (c.419G>A)          | 14.11 | 25.76       | 337.32                                           | 589.66    |
| R140W(c.418C>T)           | 4.78  | 1.88        | 122.52                                           | 39.13     |
| R172K (c.515G>A)          | 3.73  | 2.12        | 81.09                                            | 46.63     |

S.D. standard deviation; NCN: normalized copy number

**Figure S1** *IDH1/2* LNA-qPCR of 19 normal bone marrow samples from healthy donors according to age

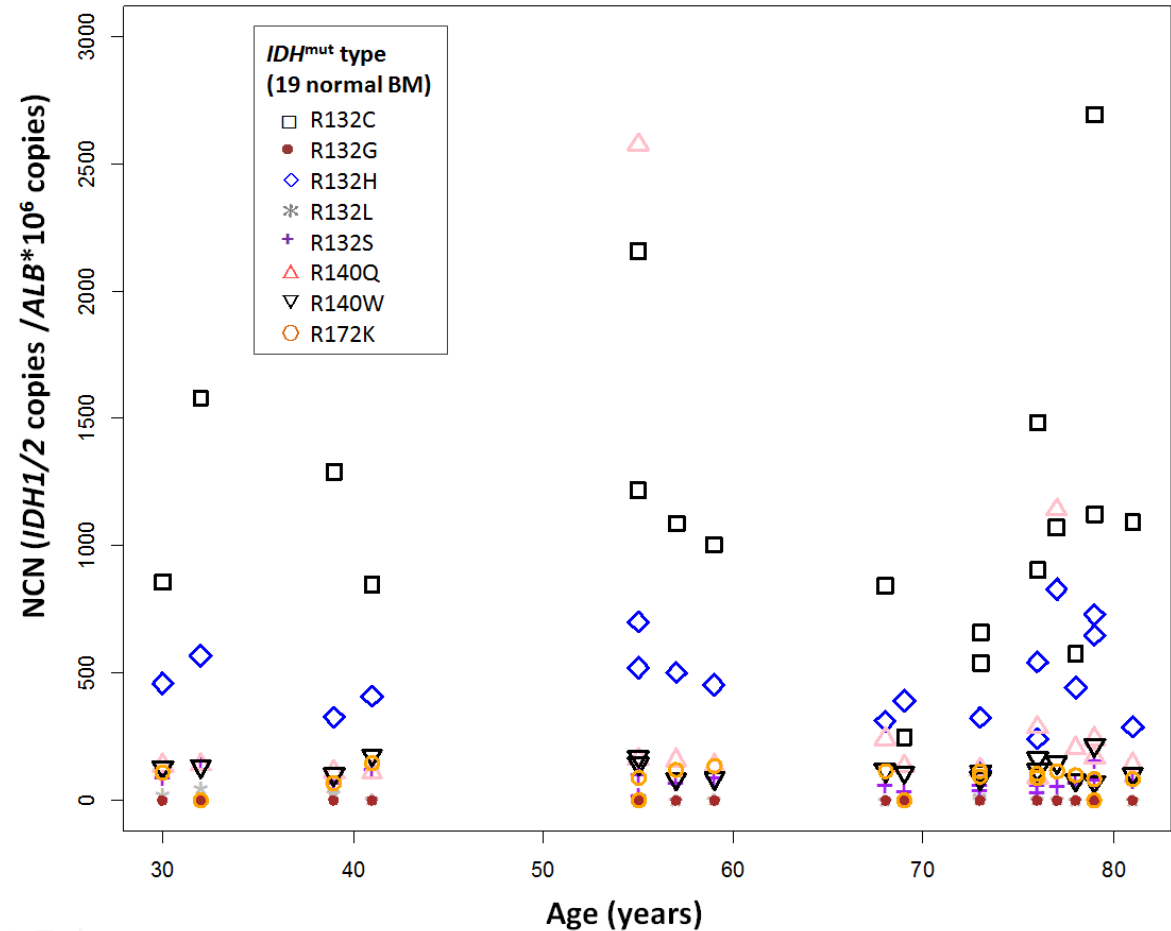

**Figure S2** MRD kinetics of individual patients with good correlation between *IDH1* LNA-qPCR MRD, *NPM1* RT-qPCR, or remission-relapse status

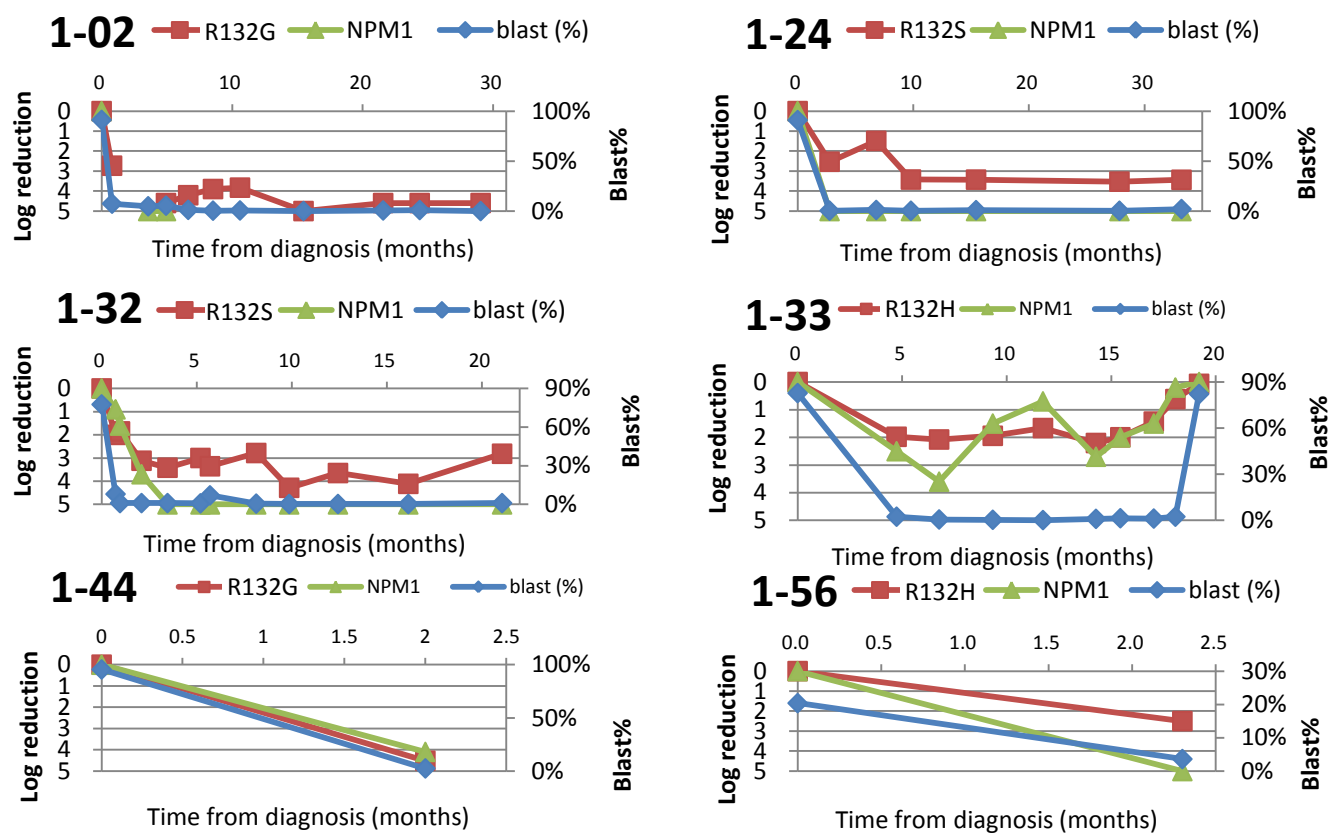

X axis indicating time from diagnosis; left Y axis indicating log reduction of mutated-target gene MRD level compared with that of diagnostic sample; right Y axis Indicating percentage of blasts in bone marrow smear.

**Figure S3** MRD kinetics of individual patients with discordant *IDH1* LNA-qPCR MRD, *NPM1* RT-qPCR, or remission status. **(a)** with *NPM1*-MRD; **(b)** without *NPM1*-MRD.

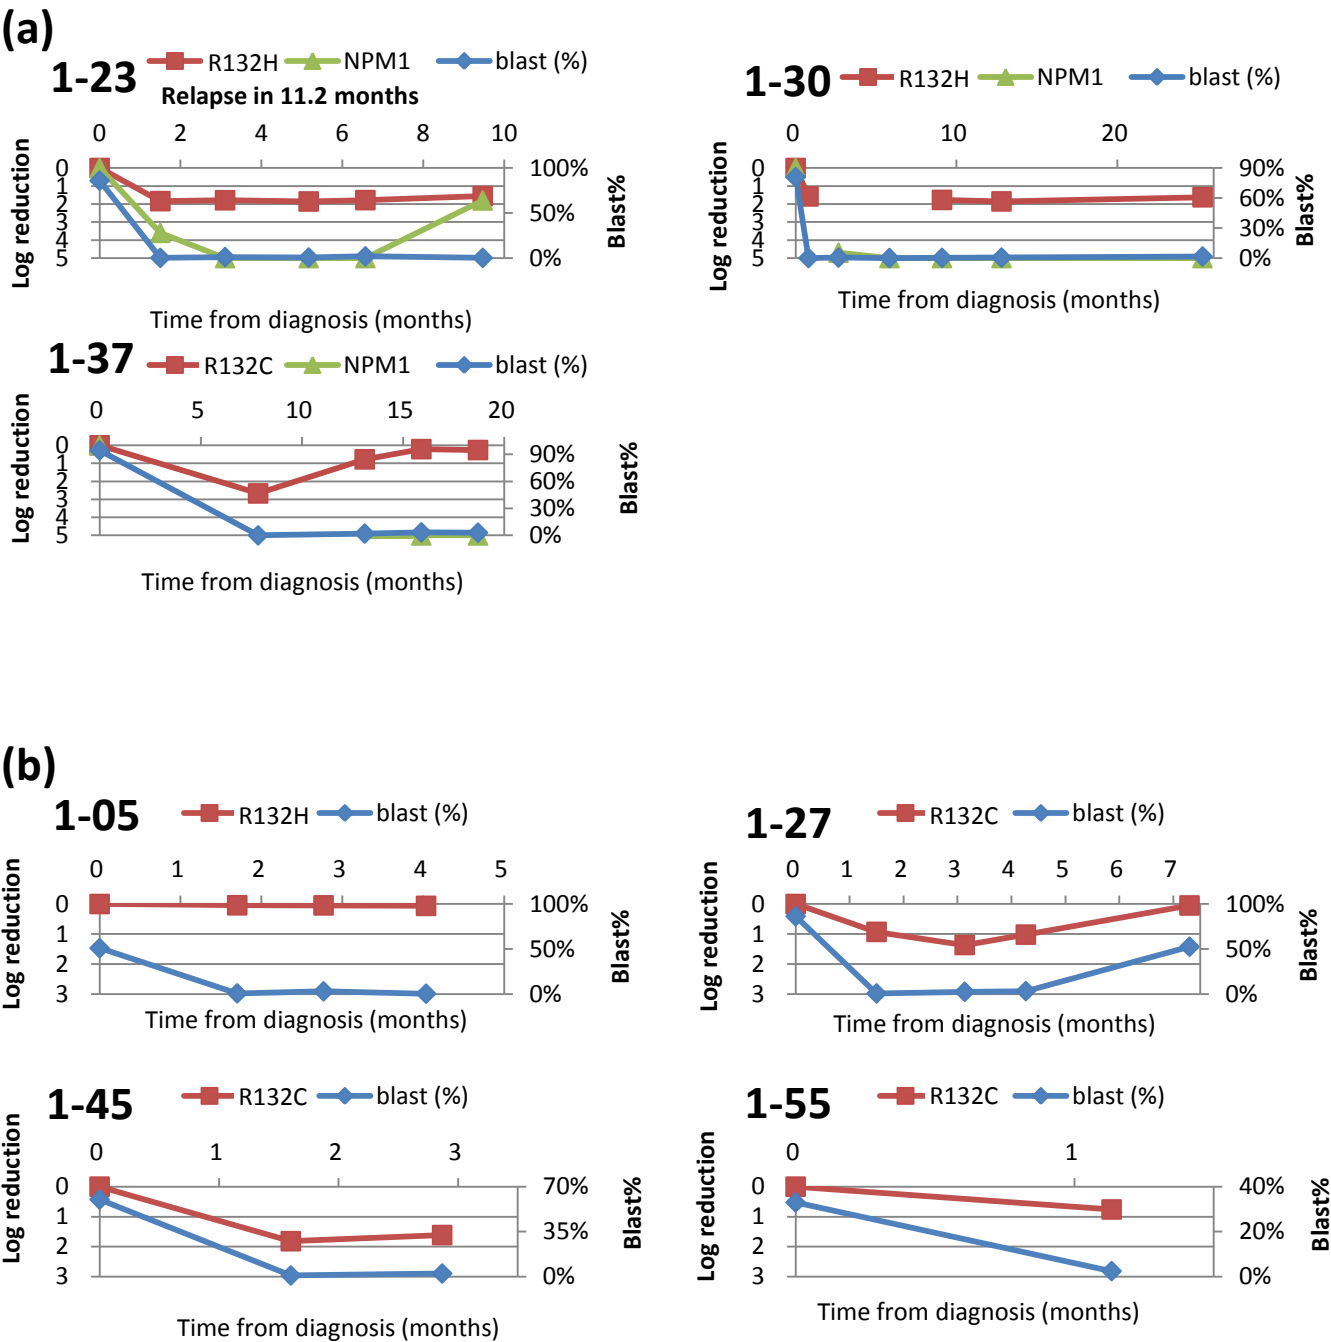

X axis indicating time from diagnosis; left Y axis indicating log reduction of mutated-target gene MRD level compared with that of diagnostic sample; right Y axis Indicating percentage of blasts in bone marrow smear.

**Figure S4** MRD kinetics of individual patients with good correlation between *IDH1* LNA-qPCR MRD and hematological remission-relapse status

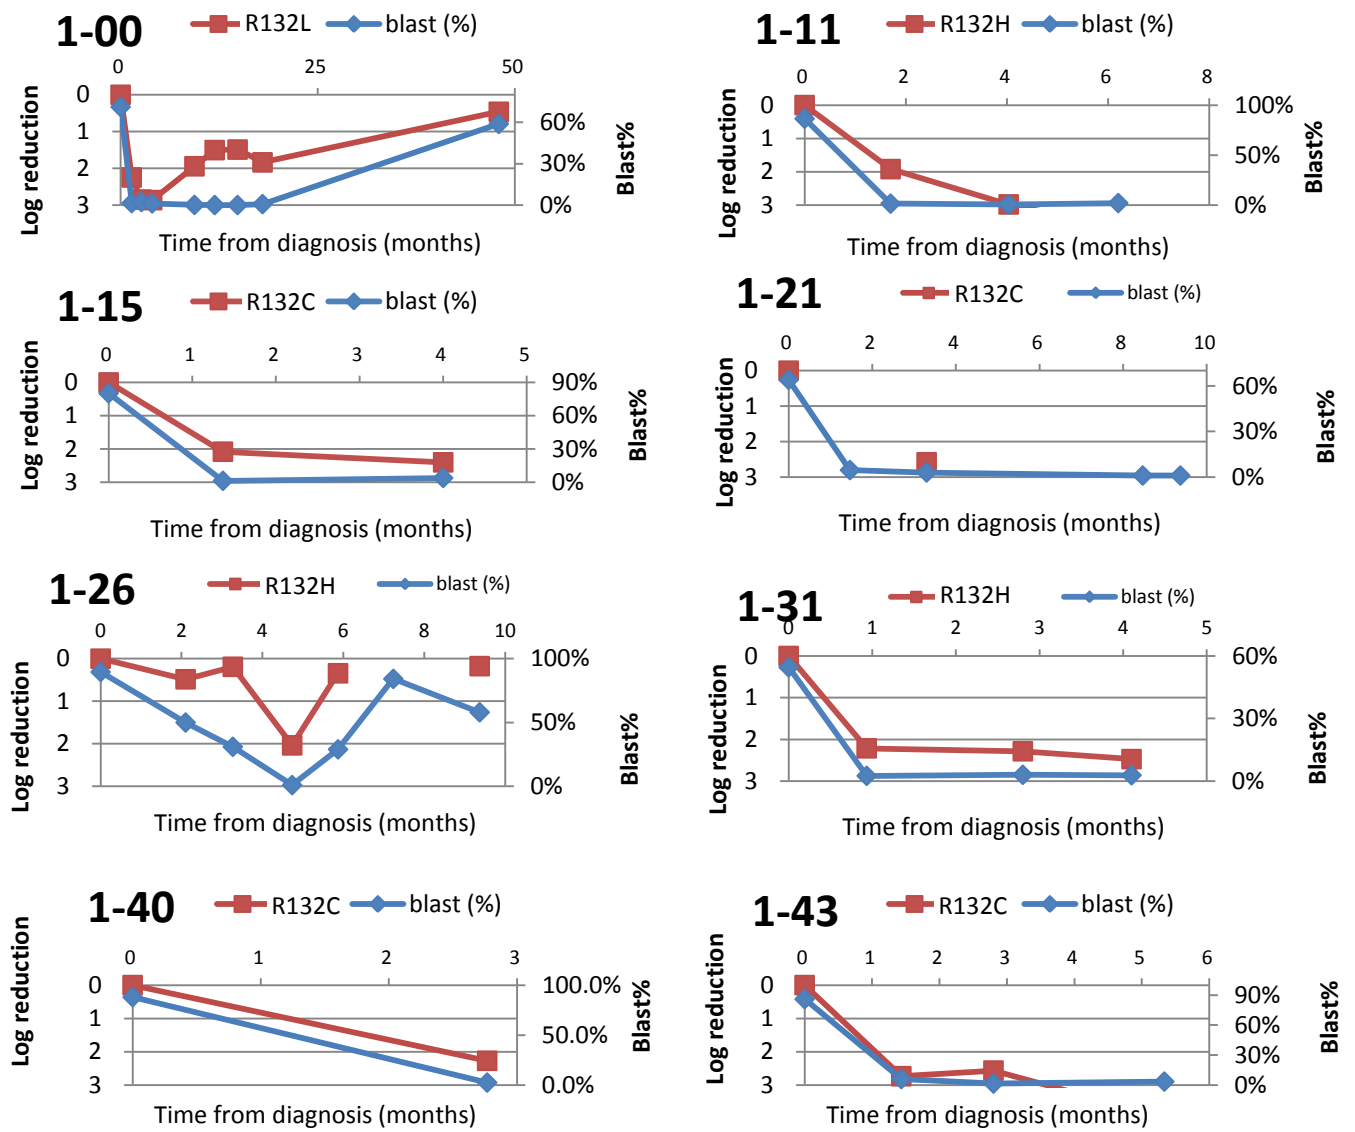

X axis indicating time from diagnosis; left Y axis indicating log reduction of mutated-target gene MRD level compared with that of diagnostic sample; right Y axis Indicating percentage of blasts in bone marrow smear.

**Figure S5** MRD kinetics of individual patients with persistent high *IDH1* LNA-qPCR MRD and relapsed or refractory status

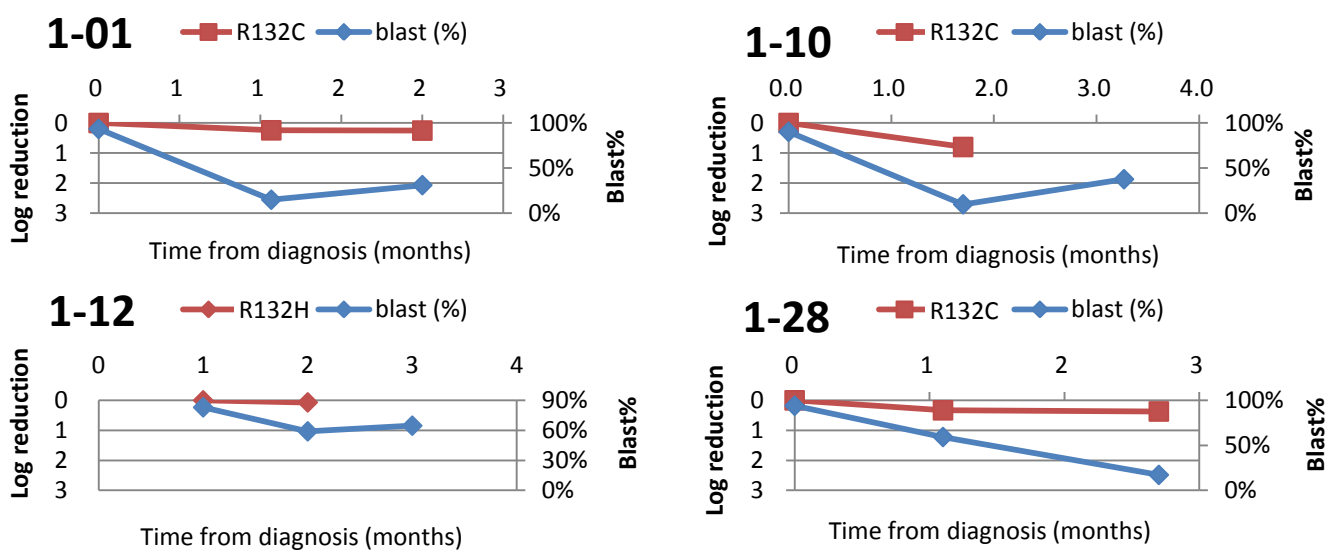

X axis indicating time from diagnosis; left Y axis indicating log reduction of mutated-target gene MRD level compared with that of diagnostic sample; right Y axis Indicating percentage of blasts in bone marrow smear.

**Figure S6** MRD kinetics of individual patients with good correlation between *IDH2* LNA-qPCR MRD, *NPM1* RT-qPCR, or remission-relapse status

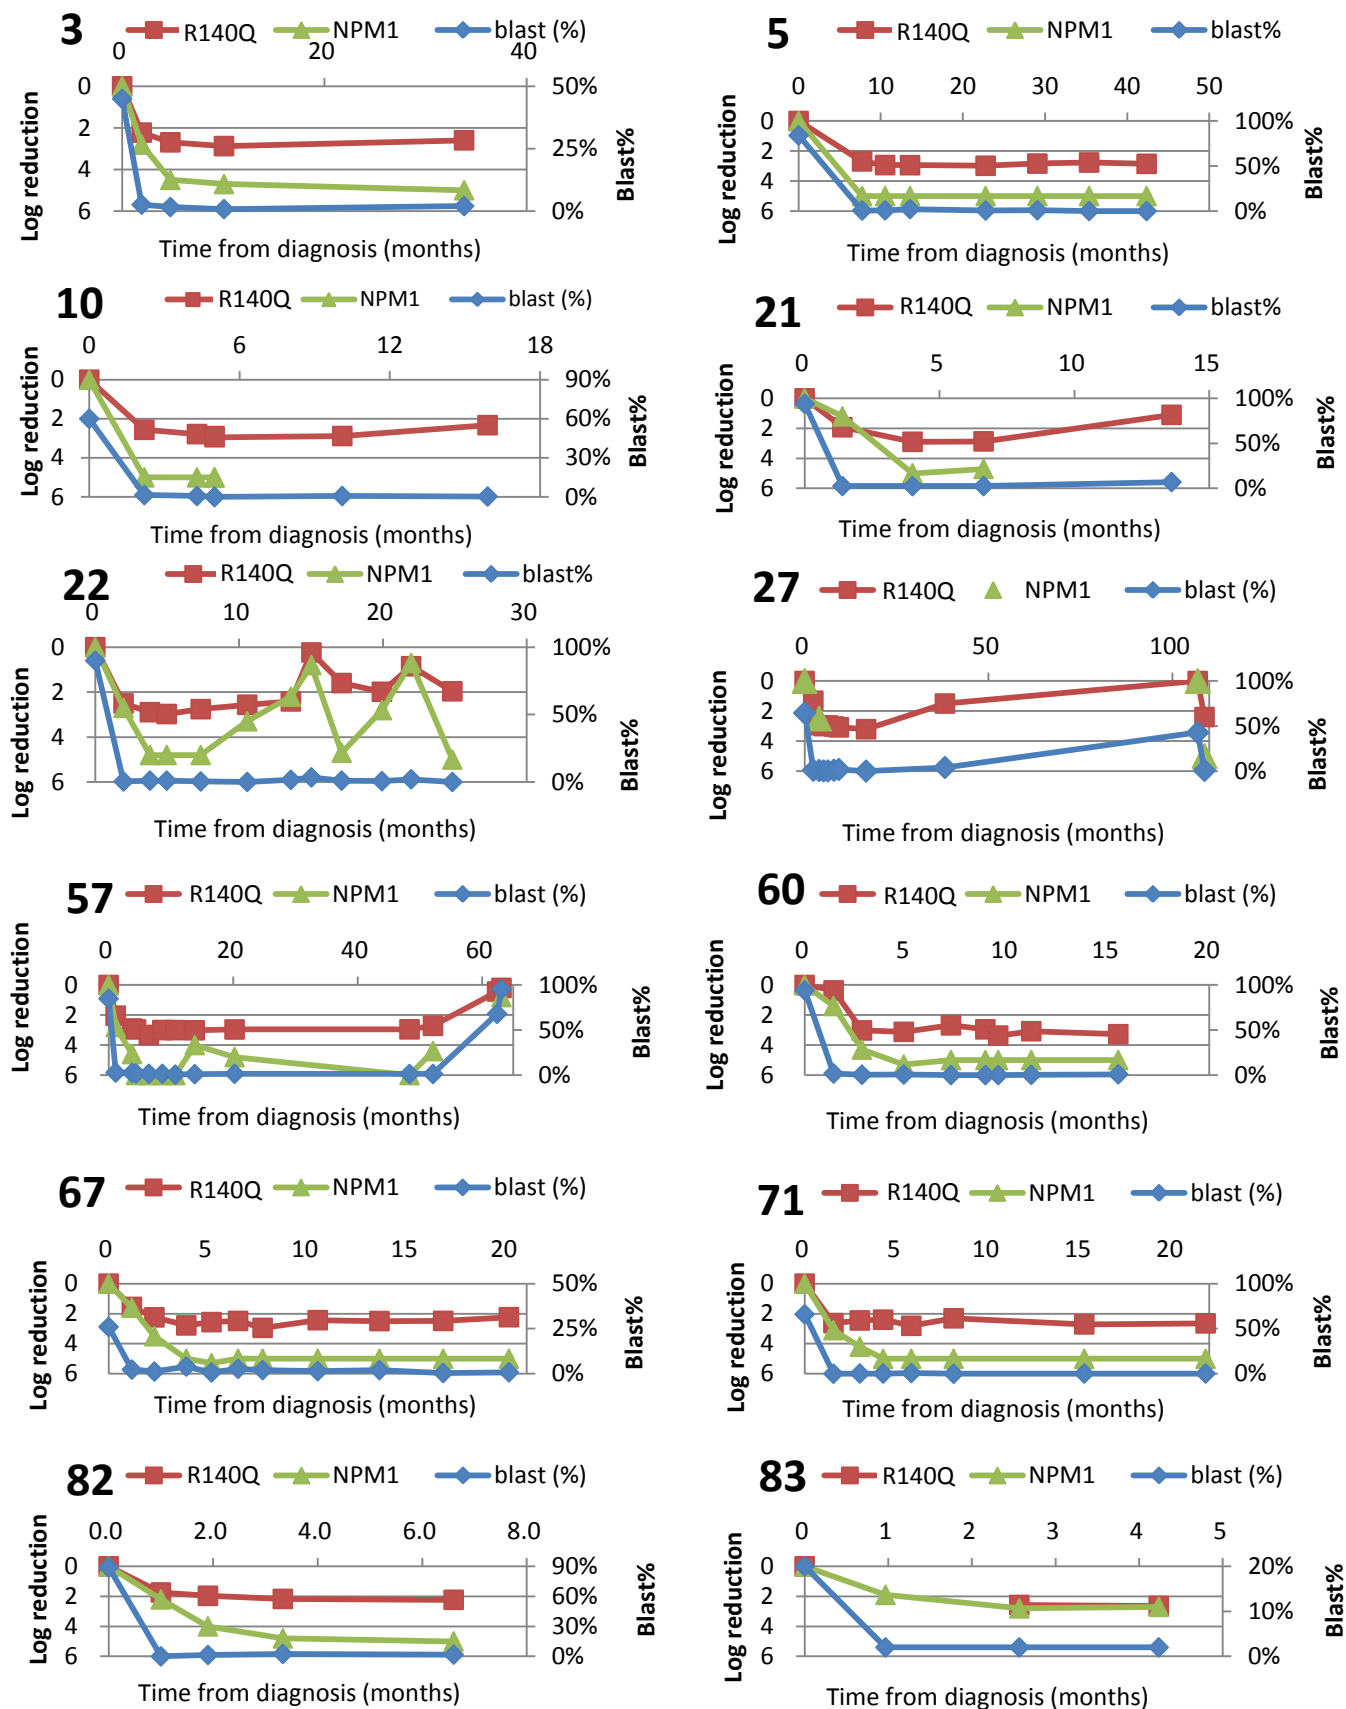

**Figure S6 (cont.)** MRD kinetics of individual patients with good correlation between *IDH2* LNA-qPCR MRD, *NPM1* RT-qPCR, or remission-relapse status

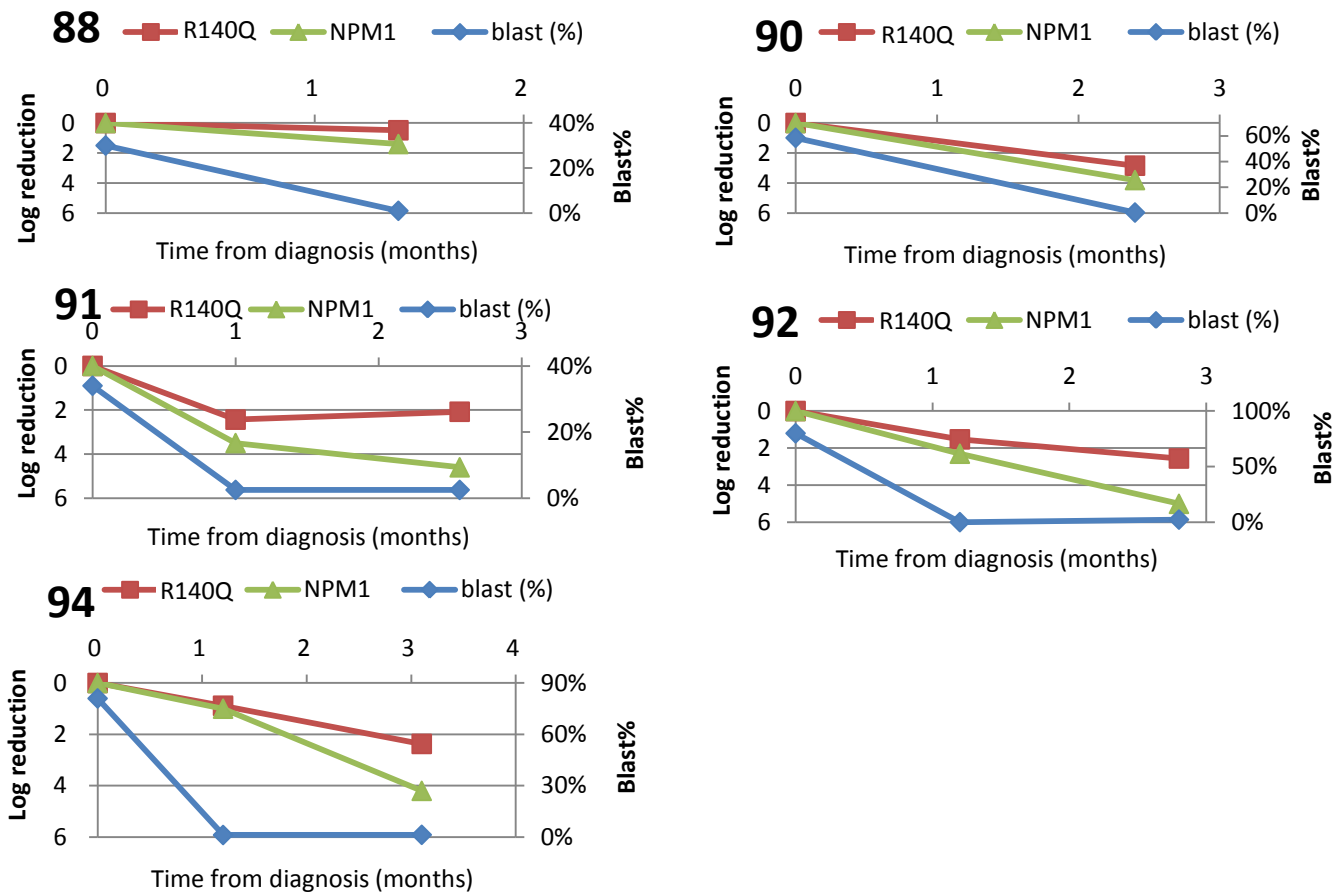

X axis indicating time from diagnosis; left Y axis indicating log reduction of mutated-target gene MRD level compared with that of diagnostic sample; right Y axis Indicating percentage of blasts in bone marrow smear.

**Figure S7** MRD kinetics of individual patients with discordant *IDH2* LNA-qPCR MRD, *NPM1* RT-qPCR MRD, and hematology remission status. **(a)** with *NPM1*-MRD; **(b)** without *NPM1*-MRD.

**(a)**

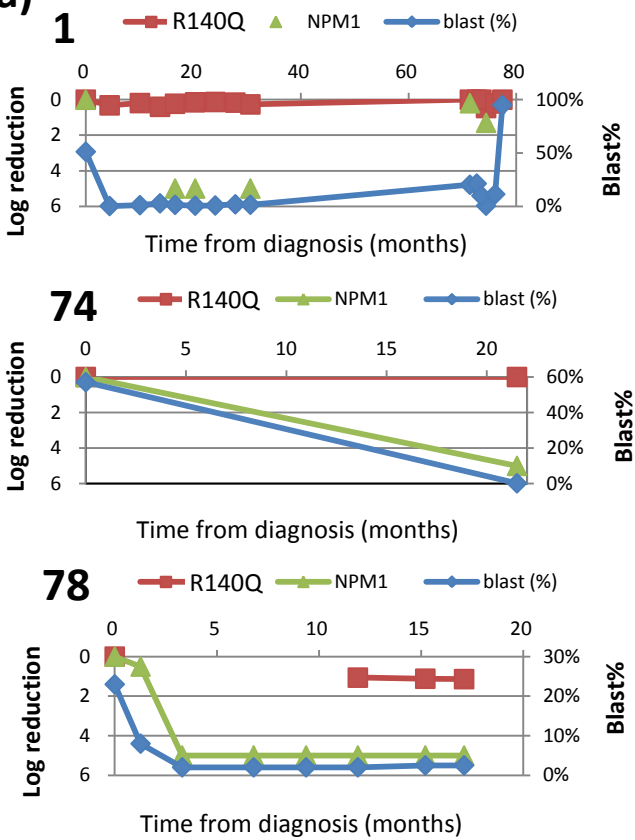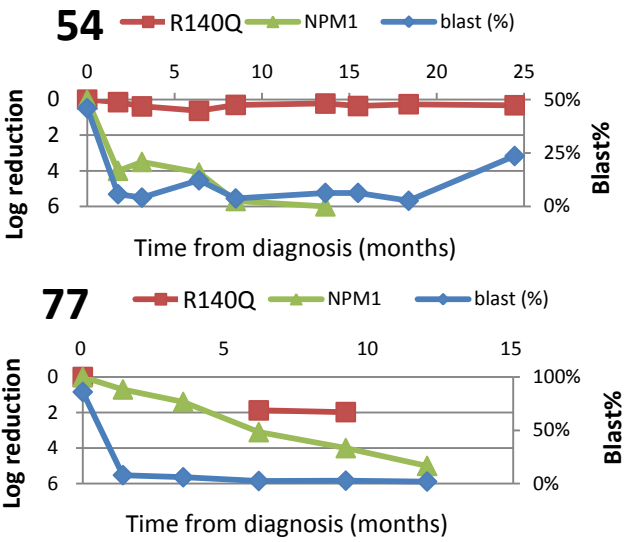

**(b)**

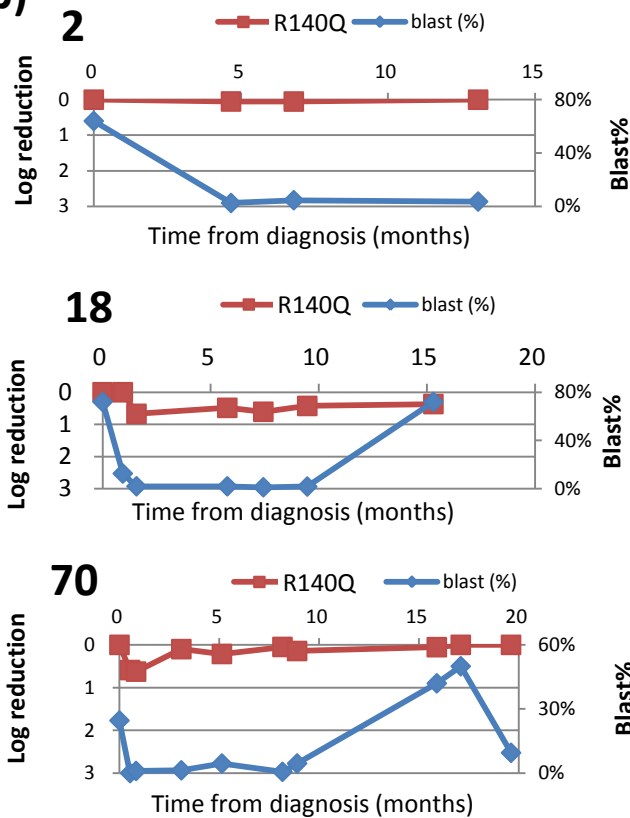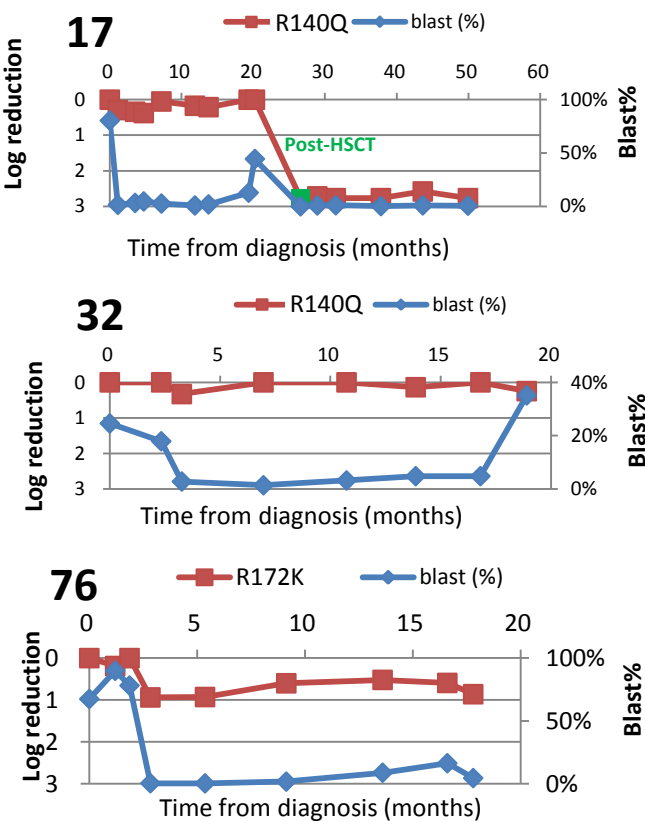

X axis indicating time from diagnosis; left Y axis indicating log reduction of mutated-target gene MRD level compared with that of diagnostic sample; right Y axis Indicating percentage of blasts in bone marrow smear.



**Figure S8** MRD kinetics of individual patients with good correlation between *IDH2* LNA-qPCR MRD and hematological remission-relapse status

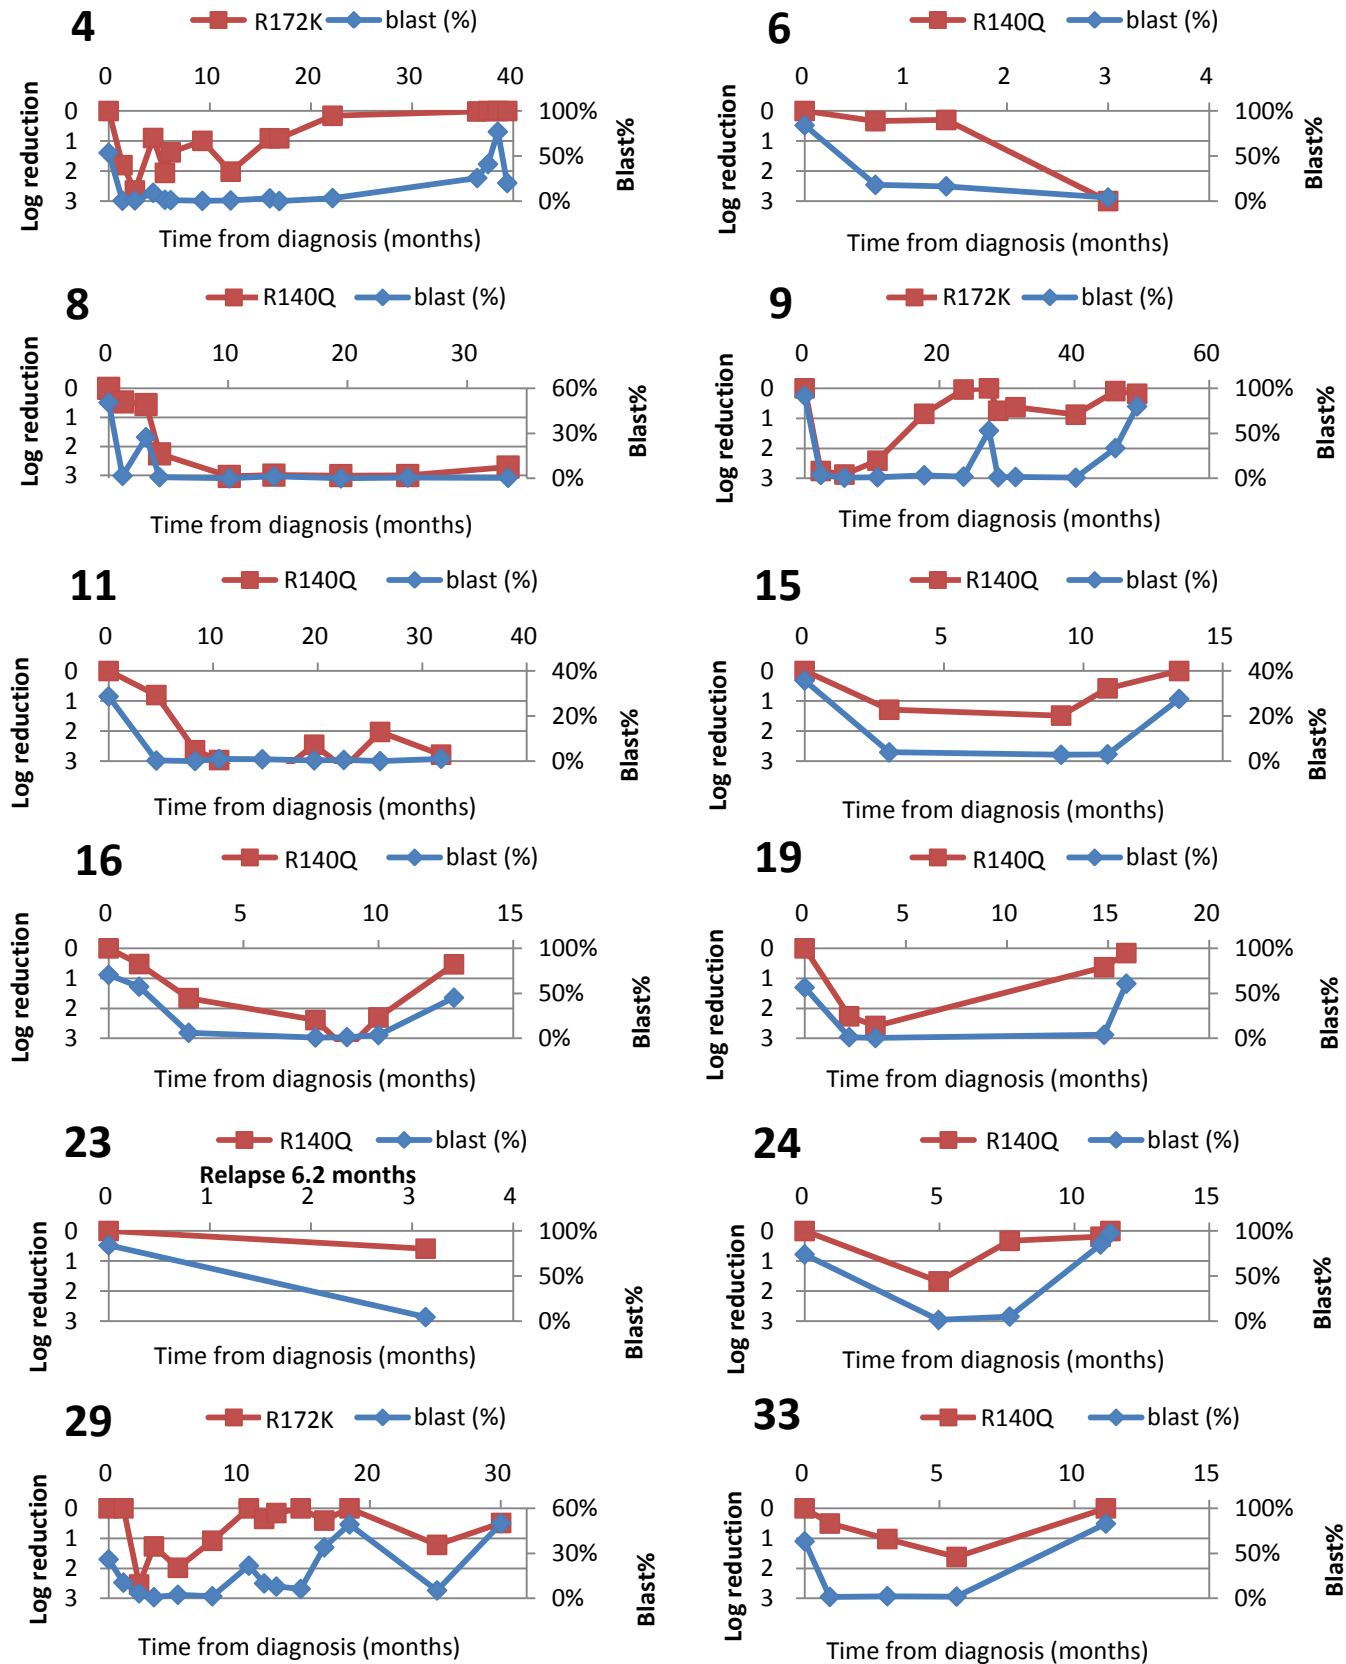

**Figure 8 (cont.)** MRD kinetics of individual patients with good correlation between *IDH2* LNA-qPCR MRD and hematological remission-relapse status

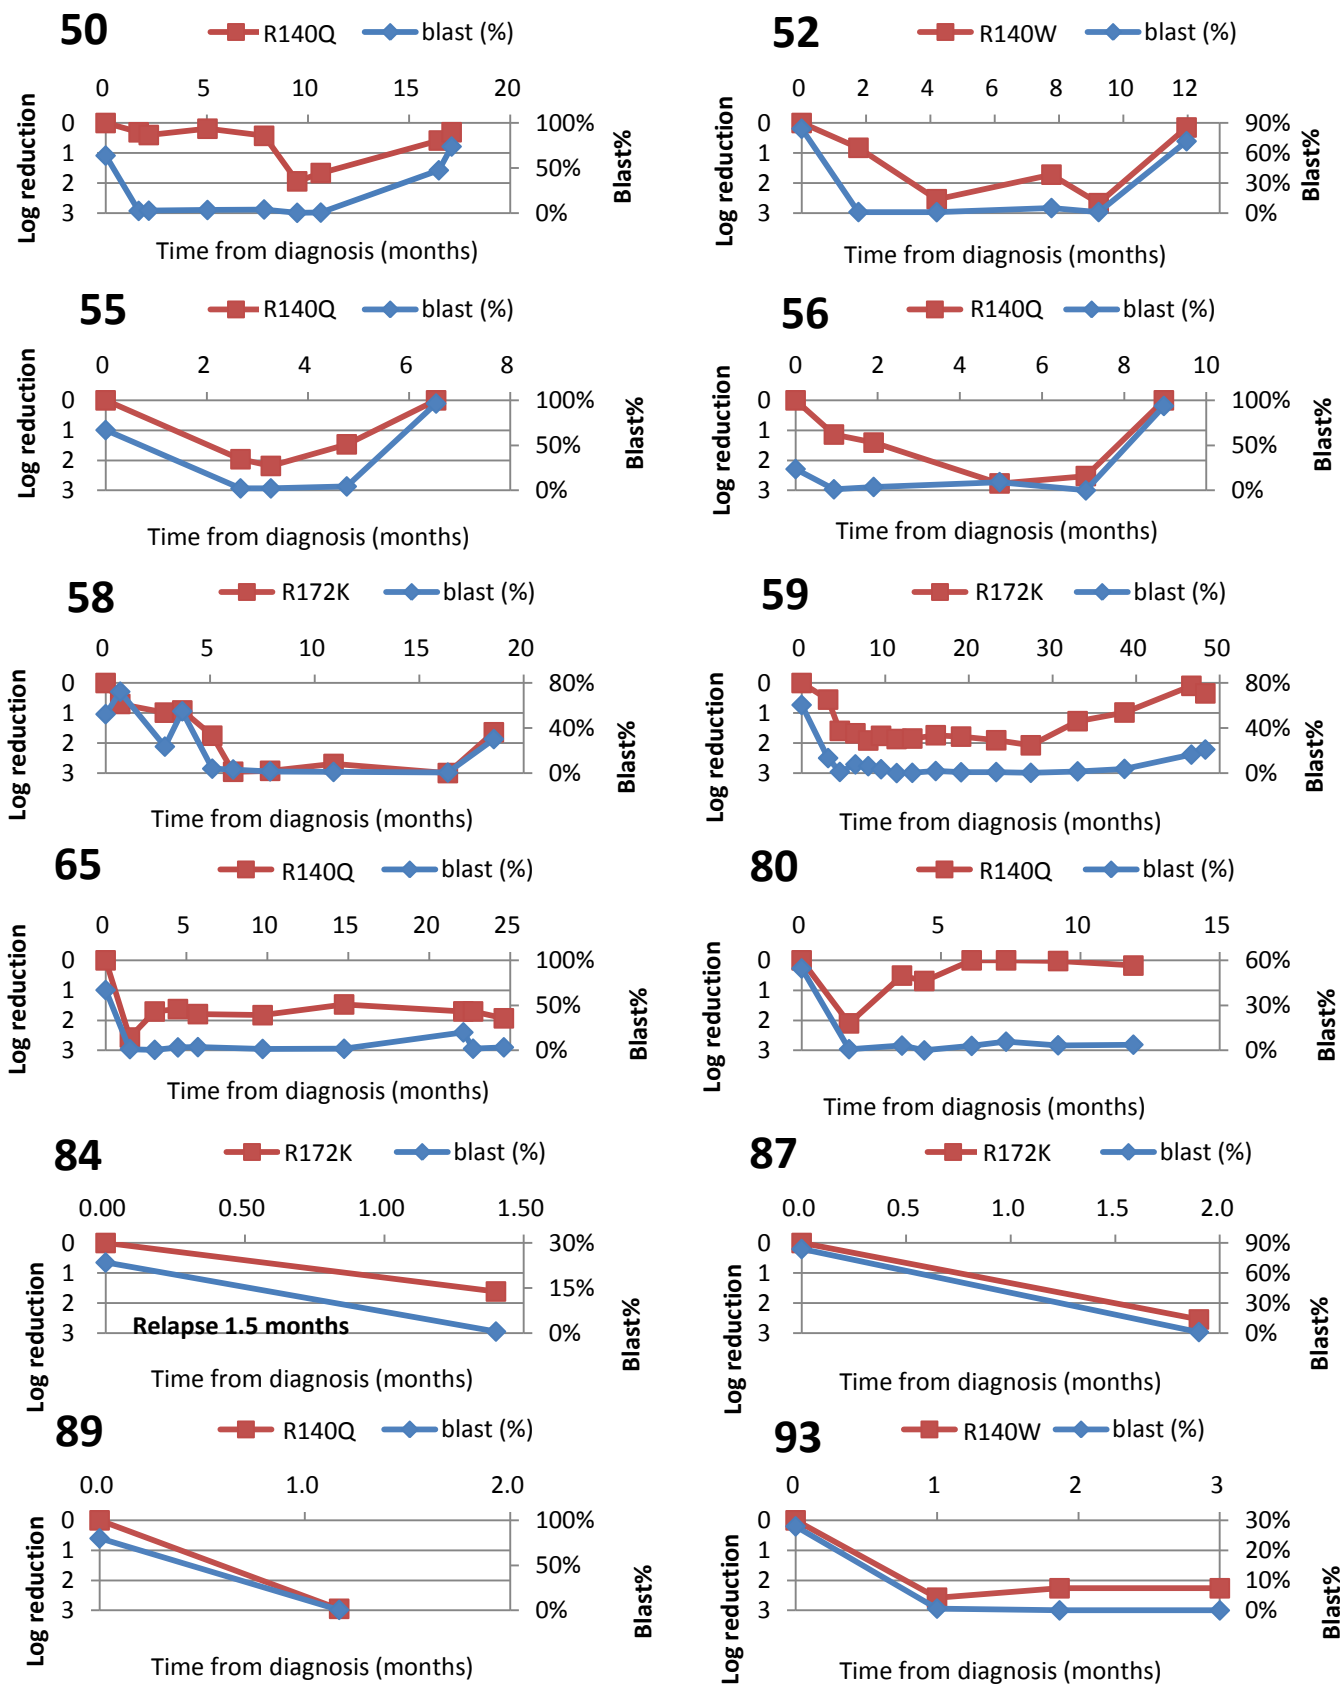

**Figure S8 (cont.)** MRD kinetics of individual patients with good correlation between *IDH2* LNA-qPCR MRD and hematological remission-relapse status

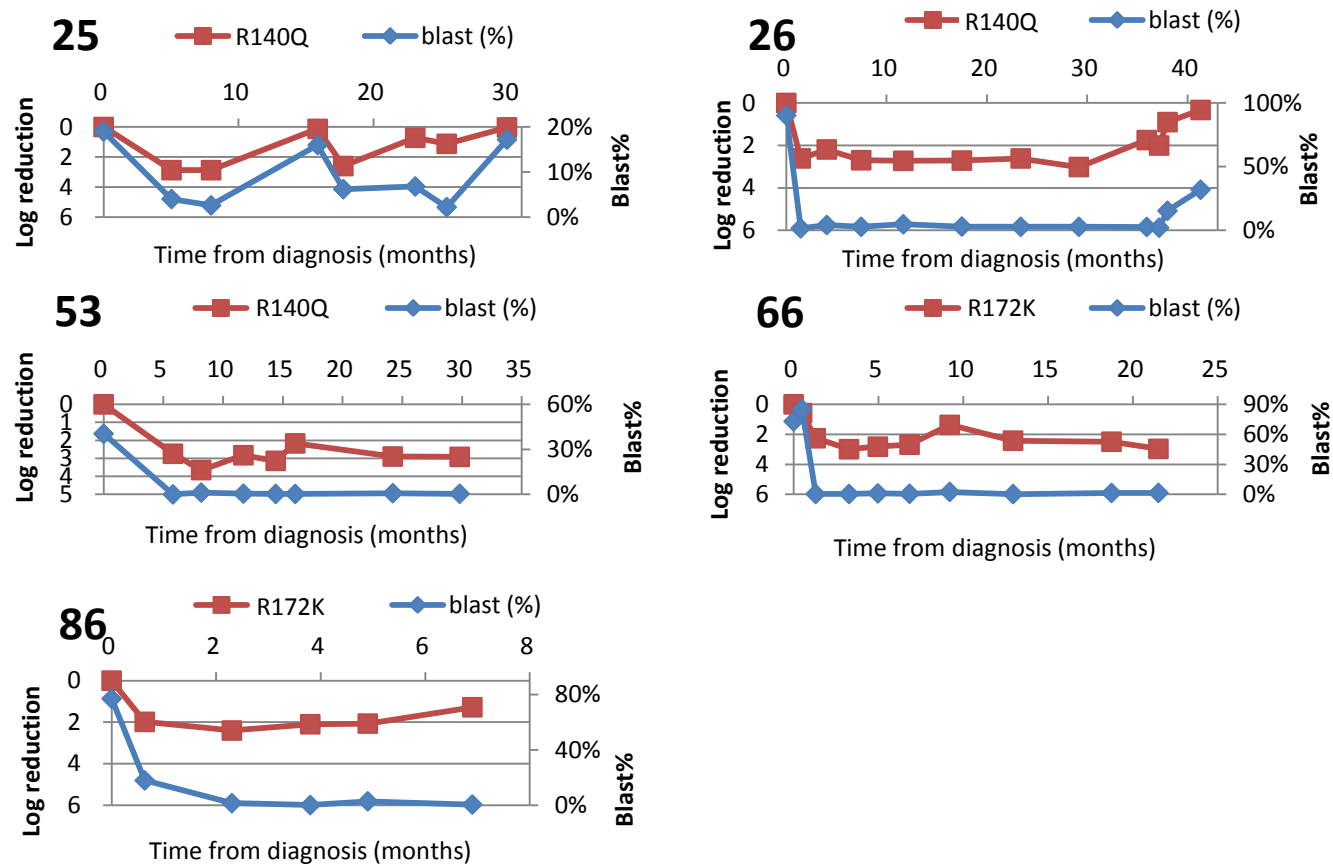

X axis indicating time from diagnosis; left Y axis indicating log reduction of mutated-target gene MRD level compared with that of diagnostic sample; right Y axis Indicating percentage of blasts in bone marrow smear.

**Figure S9** MRD kinetics of individual patients with persistent high *IDH2* LNA-qPCR MRD and relapsed refractory status

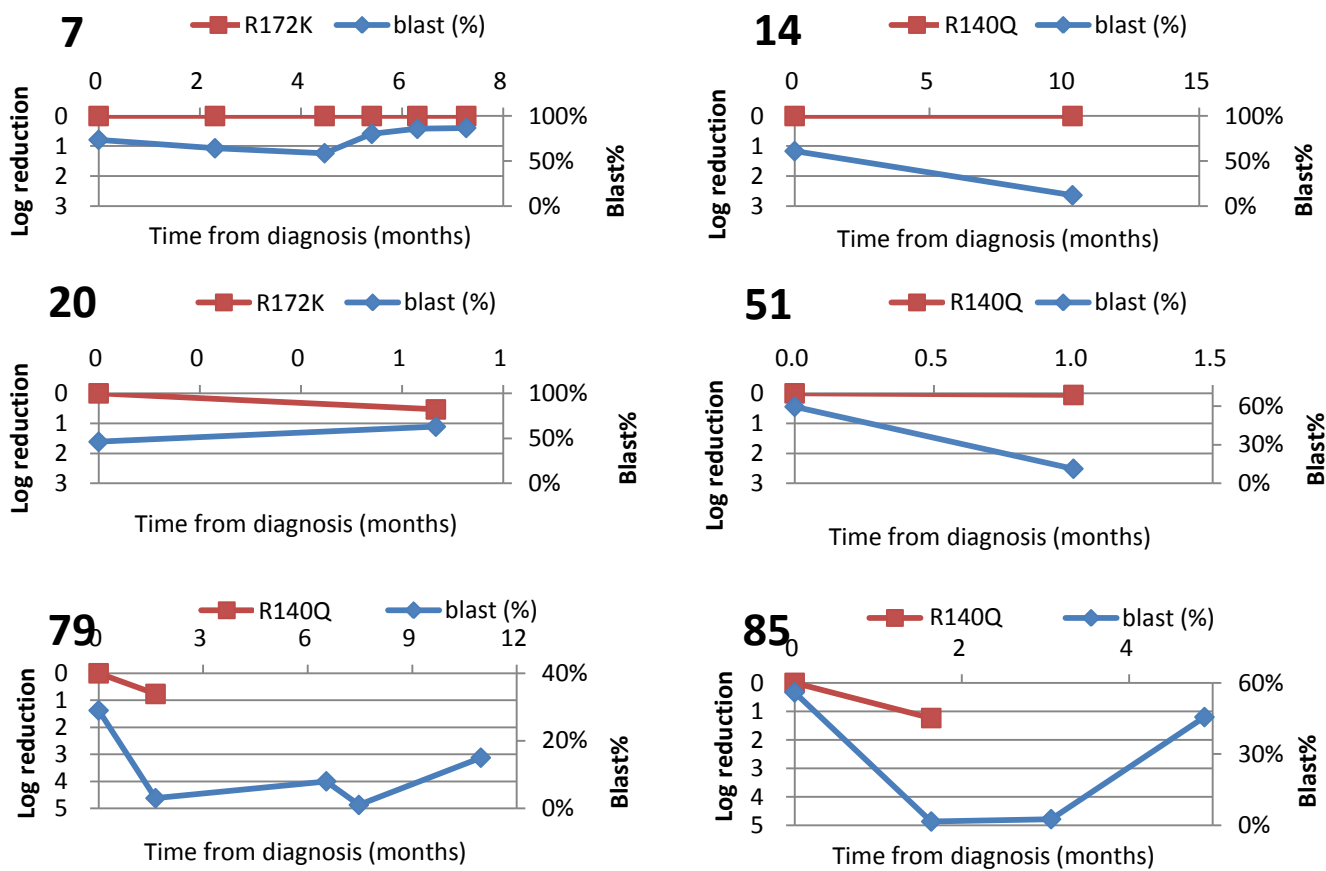

X axis indicating time from diagnosis; left Y axis indicating log reduction of mutated-target gene MRD level compared with that of diagnostic sample; right Y axis Indicating percentage of blasts in bone marrow smear.

**Figure S10** Summary of MRD kinetics according to the concordance between *IDH1/2* LNA-qPCR MRD and the disease status. *IDH1/2*-MRD kinetics of **(a)** concordant patients who achieved complete remission and without relapse, **(b)** concordant patients who achieved complete remission and with relapse, **(c)** primary refractory patients, **(d)** patients with persistent high *IDH1/2*-MRD during complete remission.

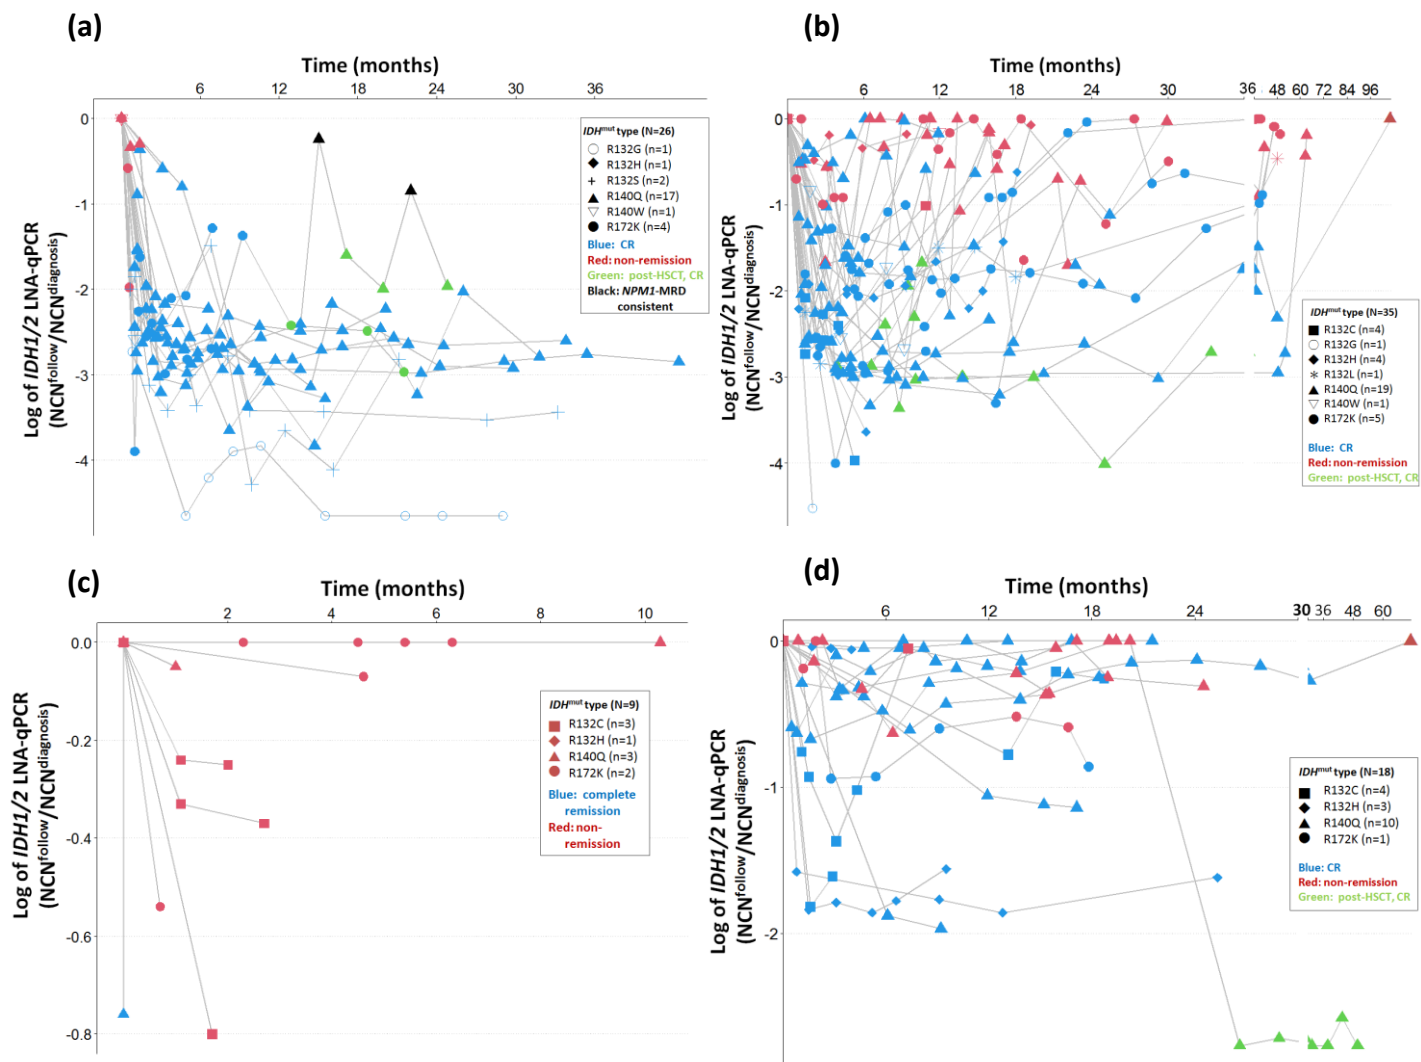

Supplement: s1 [file s1]
